# Supplementary material for: Inhibition of GSK3β Reduces Ectopic Lipid Accumulation and Induces Autophagy by The AMPK Pathway in Goat Muscle Satellite Cells
Source: PubMed Central journal article supplement (PMC6912237; doi:10.3390/cells8111378), 2019-11-01
Supplement: cells-08-01378-s001.pdf [file cells-08-01378-s001.pdf]

## Supplementary Materials

**Table S1.** Primer sequences used in this study.

| Gene name      | Primer name | Primer sequence (5'-3') | Size (bp) | Tm (°C) |
|----------------|-------------|-------------------------|-----------|---------|
| ACC            | ACC-F       | CCGTCTGTGATGACTTTGA     | 191       | 57      |
|                | ACC-R       | CTTTCTGGGTTGGGTGAG      |           |         |
| FASN           | FASN-F      | CTGCTCAGTGGGCTCCTCA     | 187       | 60.4    |
|                | FASN-R      | TGGCGGTCAGTGGCTATGT     |           |         |
| SREBP-1        | SREBP1-F    | CTGCTGACCGACATAGAAGACAT | 81        | 59.6    |
|                | SREBP1-R    | GTAGGGCGGGTCAAACAGG     |           |         |
| C/EBP $\alpha$ | CEBP-F      | GGCAACGACTTTGACTACCCG   | 208       | 62.5    |
|                | CEBP-R      | TGCTTCGCTTCGTCTCC       |           |         |
| PPAR $\gamma$  | PPAR1-F     | GTGTCACTCCTGAACGAAAT    | 156       | 60      |
|                | PPAR1-R     | GGAAATGCTGGAGAAGTCAA    |           |         |
| FABP4          | FABP4-F     | ACTGGGATGGGAAATCAACC    | 117       | 59      |
|                | FABP4-R     | CCTTGGCTTATGCTCTCTCG    |           |         |
| PPIA           | PPIA-F      | AAGTCCCGAAGACAGCAGAA    | 209       | 60      |
|                | PPIA-R      | GATGCCAGGACCTGTATGCT    |           |         |

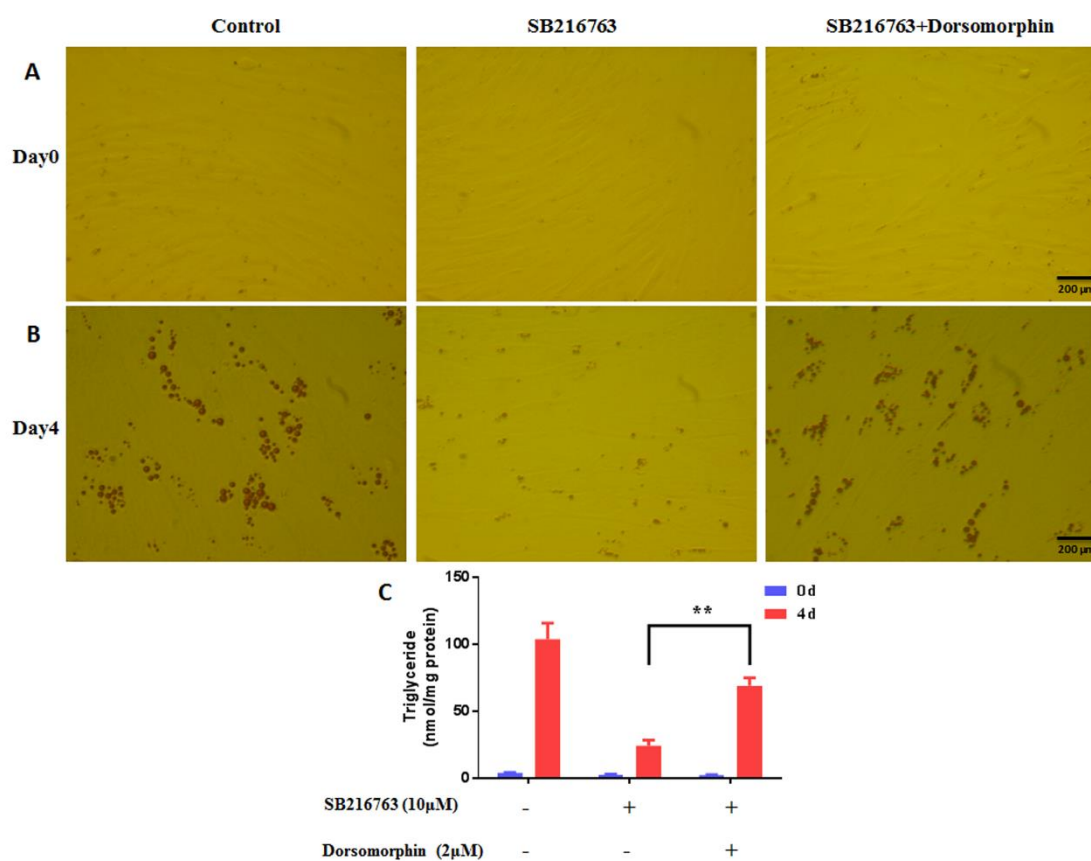

**Figure S1.** Inhibition of AMPK by Dorsomorphin can rescue the ectopic lipid deposition observed in muscle satellite cells. (A,B) Cells were fixed and stained with Oil Red O with SB216763/Dorsomorphin treatment for 0 and 4 days after adipogenic differentiation. (C) Quantitative analysis of TG content after the SB216763/Dorsomorphin treatment. Error bars represent the SEMs of three separate experiments. \*\*p < 0.01; \*p < 0.05 relative to SB216763 treatment group.
